# Supplementary material for: Green synthesis of folic acid-conjugated gold nanoparticles with pectin as reducing/stabilizing agent for cancer theranostics
Source: Royal Society of Chemistry journal article supplement (doi:10.1039/c6ra01698g), 2016-01-01
Supplement: c6ra01698g1.pdf [file c6ra01698g1.pdf]

Supplementary Material (ESI) for RSC Advances

**Green synthesis of folic acid-conjugated gold nanoparticles with pectin as reducing/stabilizing agent for cancer theranostics**

Raja Modhugoor Devendiran<sup>a</sup>, Senthil kumar Chinnaiyan<sup>b</sup>, Narra Kishore Yadav<sup>b</sup>, Ganesh Kumar Moorthy<sup>c</sup>, Giriprasath Ramanathan<sup>a</sup>, Sivakumar Singaravelu<sup>a</sup>, Uma Tirichurapalli Sivagnanam<sup>a\*</sup>, Paramasivan Thirumalai Perumal<sup>d\*</sup>

*a.* Bioproducts Lab, CSIR-Central Leather Research Institute, Chennai-600020, Tamilnadu, India. E-mail: suma67@gmail.com; Tel: + 91 44 24420709; Fax: +91 44 24911589

*b.* Department of Pharmaceutical Technology, Anna University, BIT campus, Tiruchirappalli-620024, India.

*c.* Bio-Chemistry Lab, CSIR– Central Leather Research Institute, Adyar, Chennai-600020, India..

*d.* Organic Chemistry Division, CSIR-Central Leather Research Institute, Adyar, Chennai-600020, Tamilnadu, India. E-mail: ptperumal@gmail.com; Fax: +91 44 24911539; Tel: + 91 44 24437223

**Contents:**

**Page No.**

Supplementary Figures

02

## Supplementary Figures

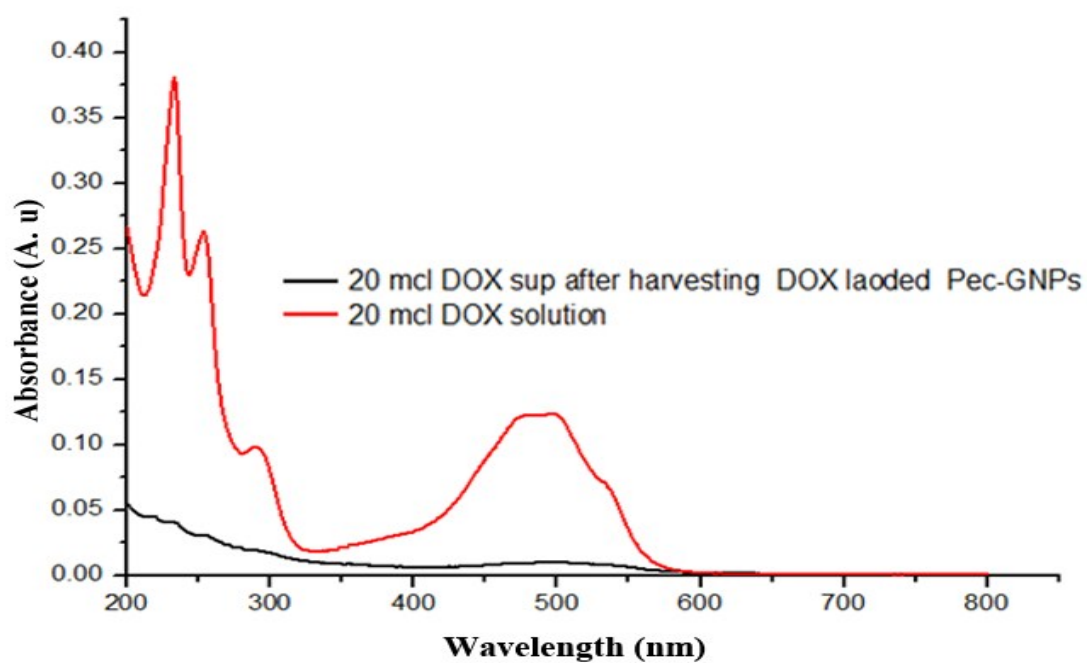

Fig. S1 UV-Visible spectra of DOX solutions before adding Pec-GNPs and after harvesting DOX loaded Pec-GNPs
